# Supplementary figures and images for: YES1 as a Therapeutic Target for HER2-Positive Breast Cancer after Trastuzumab and Trastuzumab-Emtansine (T-DM1) Resistance Development
Source: MDPI journal article supplement (doi:10.3390/ijms222312809), 2021-11-26

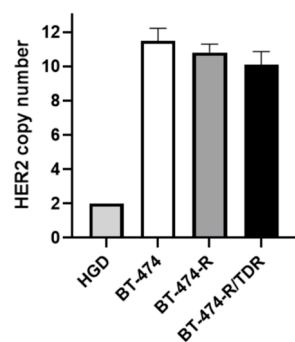

Figure S1

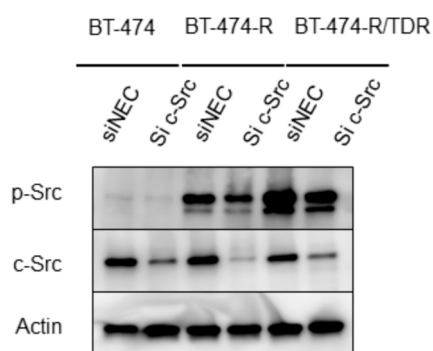

(A)

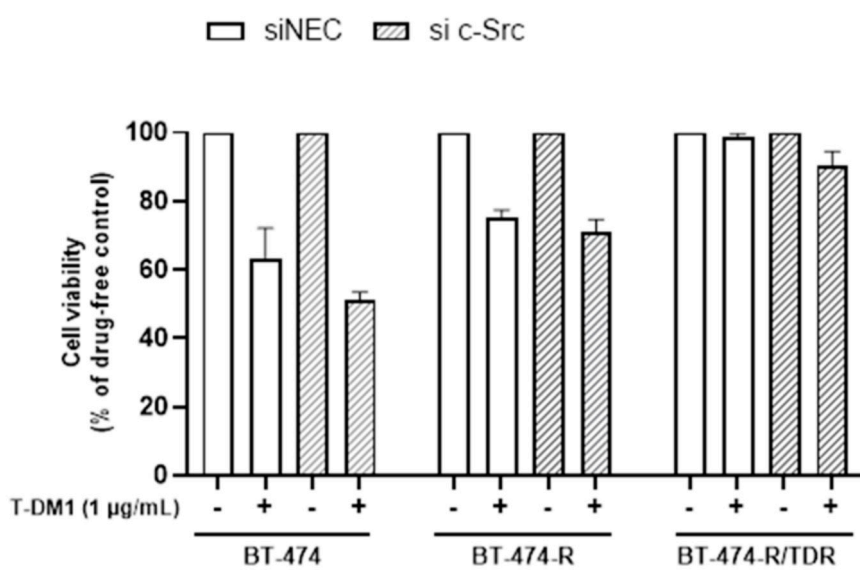

(B)

Figure S2

Supplement: s1 [file s1]
